# Supplementary material for: How capacity building of district health managers has been designed, delivered and evaluated in sub-Saharan Africa: a scoping review and best fit framework analysis
Source: PubMed Central journal article supplement — BMJ Open. 2023 Aug 2;13(8):e071344. doi: 10.1136/bmjopen-2022-071344 (PMC10401232; doi:10.1136/bmjopen-2022-071344), 2023-08-02
Supplement: bmjopen-2022-071344supp003.pdf [file bmjopen-2022-071344supp003.pdf]

## Supplemental Text 1

### How capacity building of district health managers has been conceptualised and operationalised in sub-Saharan Africa: a scoping review protocol

#### Background

In 2015, health systems in sub-Saharan Africa (SSA), similarly to other low- and middle-income countries (LMICs), failed to achieve the health-related Millennium Development Goals (MDGs) (1). SSA accounts for almost half of all deaths of children under-five years and the highest maternal mortality ratio. It bears the highest burden of HIV/AIDS, malaria and tuberculosis in the world (1,2). This poor performance is partly due to the health system weaknesses, which may be attributable to multiple causes (3), including political instability and insecurity, reliance on and poor coordination of donor funding, limited public accountability, excessive centralization of power, and weak leadership and management, especially at the district level (3–6).

Leadership and management's role in improving health systems performance is widely recognised in the literature (7–12). Effective leadership and management at the district level is crucial since the health district is the operational level within which national policies and resources are translated into effective services to satisfy population needs (13–16). Building leadership and management capacity of district health managers (DHMs) is likely to improve the stewardship of local health systems and is required to ensure the achievement of better health outcomes (8,12,17,18), particularly the health-related Sustainable Development Goals (SDGs) (19).

Capacity building programs (CBP) in health systems are complex (8,20). They seek to produce changes at the individual, organisational and systemic levels (5,13,21–23). They involve the interaction between several actors (policymakers, managers, providers, funders, patients, communities, etc.). These actors belong to various institutions or social sub-systems (national or provincial health administration, district management teams, hospitals, first-line facilities, community, non-government organisations (NGOs), etc.) (24–27), and have different values, norms, decision spaces and attitudes.

Local health systems are considered complex adaptive systems (5,20,24). Health districts consist of interacting elements or sub-units (i.e., actors at first-line facilities, hospitals, district management teams, community, NGOs, etc.). They are open systems embedded in a broader (social, political, and economic) environment with which they interact continuously. From these interactions arise new (positive or negative) behaviours that may be unpredictable and non-linear. History also shapes these emergent behaviours, which reflect district adaptation to changing environment (co-evolution) (28–32). As a consequence, a CBP that works in one setting will not necessarily work in another or may not function in the same location later (33).

Capacity building (CB) emerged from the development aid field in the 1980s and became "*the central purpose of technical cooperation*" in the 1990s (34). However, CB remains an elusive, broad, umbrella or multidimensional term associated with a range of (sometimes opposite) meanings among academics and practitioners (2,22,27,35–41).

Some authors (18,42–44), the concept of CB is implicitly or explicitly assimilated in a "simplistic way" to the development of staff's knowledge and skills through training or providing resources. Such reductionist view tends to restrict CB to its hard or measurable elements (e.g., knowledge and skills, organisational structure, procedures and resources) (42,45–48). In contrast, other scholars (13,35,36,49) consider CB as a systemic approach that in addition to hard measures, take into account soft and less tangible aspects such as leadership, motivation and organisational culture (40,50,51).

Other scholars use "capacity building" and "capacity development" (CD) interchangeably (22,52). In contrast, others prefer to use capacity development that stresses the importance of ownership by partner organisations and unlike CB, does not underestimate the potential and existing capacities of partner organisations (34,50,53).

The conceptual heterogeneity, its meanings and holistic versus reductionist perspective explains the diversity of CBP designs, approaches, models and tools (2,8,22,27,35). It also explains the methodological challenges related to CBP process evaluation (40,50) and their effectiveness on organisational performance (22,23,36,54). Most of these evaluations are focused on individual level interventions and on pre- and post-test approaches (23,55). Little attention has been paid to the underlying theories, models or frameworks underpinning CBP. Few studies attempted to understand what works, how, and why, except for Prashanth *et al.* (24), Kwamie *et al.* (5), and Orgill *et al.* (51). Bergeron *et al.* (56) and Whittle *et al.* (27).

To fill this gap, we will carry out a scoping review focused on identifying the underlying theories behind CBP at district- or local health system level. We will explore the processes underlying their effects and the contextual conditions within which these processes are facilitated or hindered. We aim more specifically to understand how CBP of DHMs have been conceptualised, operationalised and evaluated in SSA.

## Methods

Given the complexity of CBP, the conceptual heterogeneity of CB and the need to identify underlying theories and mechanisms of CBP, the scoping review methodology proved appropriate. The scoping review is a suitable approach to map key concepts, different types of evidence and research gaps related to a defined research area (57,58). We will follow the five steps proposed by Arksey and O'Malley (57) for a scoping review while taking into account the recommendations of Levac *et al.* (59) and Daudt *et al.* (60). These steps are:

1. Identifying the research question
2. Identifying relevant studies
3. Study selection
4. Charting data
5. Collating, summarizing and reporting the results

### *1. Identifying the research question*

Our scoping review aims to answer the following research questions:

- How has the CB notion been conceptualised in the health systems management literature?
- How has CBP of district health managers been operationalised at the local health systems (health districts) in SSA?
- How has CBP been evaluated at the local health systems (health districts) in SSA?

The answers to these questions will allow us to:

- Map the different conceptions of CBP of DHMs in SSA.
- Identify the approaches used to build the management capacity of DHMs and their underlying theories in SSA.
- Identify methodological issues and research gaps.

## 2. Identifying relevant studies

### Sources

We will use five databases (Medline/PubMed, Health systems evidence, and Wiley online library, Cochrane Library, and Google scholar) for scientific literature search. The reasons for choosing these databases are presented in table 1. We will also search for grey literature from international organisations that support CBP in health systems of SSA (e.g. World Health Organisation, European Union, USAID, Management Sciences for Health, Belgian Development Agency, etc.). We will complete these literature searches using the citation tracking and snowball techniques.

*Table 1: Reasons for the choice of research databases*

| <b>Databases</b>                     | <b>Reasons for the choice</b>                                                                                                                                                                                                                                                                               |
|--------------------------------------|-------------------------------------------------------------------------------------------------------------------------------------------------------------------------------------------------------------------------------------------------------------------------------------------------------------|
| <b>PubMed</b>                        | PubMed is the leading, most used, and free-access research database for biomedical literature in the world. It contains more than 32 million citations from MEDLINE, among which papers that deal with management CBP of DHMs in SSA are likely to be included.                                             |
| <b>Wiley library online</b>          | Wiley library online is one of the largest, most authoritative and free-access databases of online journals in the life, health, social, and physical sciences. Among its 7.5 million articles from over 1,600 journals, it is possible to find some papers related to our research questions.              |
| <b>Cochrane library</b>              | Cochrane Library is made of databases containing various forms of high-quality, independent evidence to inform healthcare decision-making. We hope to find some articles related to our research questions, especially within the Cochrane Effective Practice and Organisation of Care (EPOC).              |
| <b>Health Systems Evidence (HSE)</b> | HSE is one of the world's most comprehensive, free access points for evidence to support policymakers, stakeholders, and researchers interested in strengthening or reforming health systems. Since this purpose fits our research topic, HSE appears to be an interesting database to search for evidence. |
| <b>Google Scholar</b>                | Google Scholar gives free access to a wide variety of scholarly literature from different disciplines, including biomedical and health sciences. It has the advantage of containing articles published or not in peer-review journals and indexed in the above databases.                                   |

### Search strategy

We constructed our search strategy based on the Joanna Briggs Institute's "PCC approach" (Population, Concept and Context) (61).

- **Population:** DHMs are health officers who work in local health systems and spend some of their time in management and/or administrative roles. They have various profiles (physicians, nurses, pharmacists, administrators, etc.) and play different roles within the district health system (district medical officers, hospital directors, nursing officers, nurse supervisors, etc.) (62).
- **Concept:** Search terms will include "capacity building" or "capacity development" or "capacity strengthening" and health district management or leadership development.
- **Context:** SSA countries according to the World Bank countries classification by income<sup>1</sup>.

Appendix 1 outlines the search strategy to be used in PubMed. We will conduct an updated search to identify possible new studies.

### 3. Study selection

We will use the Rayyan software and select papers based on their titles and abstracts (63). Two reviewers will then examine the full texts of the articles independently to decide on their final selection based on the inclusion criteria listed in Table 1. In cases of persistent disagreement between the two reviewers, we will consult a third reviewer (59).

We will select all studies that meet the inclusion criteria regardless of their quality, as we aim to map key concepts, types of evidence and research gaps (57,58).

Table 2: Inclusion and exclusion criteria

|                                                           | Inclusion criteria                                                                                      | Exclusion criteria                                                                                                      |
|-----------------------------------------------------------|---------------------------------------------------------------------------------------------------------|-------------------------------------------------------------------------------------------------------------------------|
| <b>Type of paper</b>                                      | Original articles published in peer-reviewed journals, working papers, intervention or research reports | Editorials, opinions, commentaries, workshop reports, conference abstracts, conference proceedings, research protocol   |
| <b>Content of paper</b><br>(Population, Concept, Context) | Studies related to DHMs' leadership and management CBP in SSA countries                                 | Studies related to other health workers, the management of specific diseases or waste management; and non-SSA countries |
| <b>Language</b>                                           | Paper published in English or French                                                                    | Paper published in another language than English and French                                                             |
| <b>Time</b>                                               | Paper published from 1987 <sup>2</sup> to 2021                                                          | Paper published before 1987                                                                                             |

<sup>1</sup> <https://datahelpdesk.worldbank.org/knowledgebase/articles/906519-world-bank-country-and-lending-groups>

#### 4. *Charting data*

Two reviewers will extract the data, which will then be checked and validated by a third reviewer. Following the best fit framework approach (64,65), we will systematically search for an *a priori* framework against which to code the data. This *a priori* framework must allow a description of the design, implementation and evaluation of CBP.

Using an Excel form, we will extract the relevant data about:

- Study characteristics (author, year, country, type, objectives, design, methods)
- Information related to the CB intervention:
  - o Design: rationale, definition, objectives, underlying theories, intervention components
  - o Operationalisation: level (individual, organisational, systemic), type of approaches, actors (providers, participants), duration, setting
  - o Evaluation: duration after implementation, results achieved, underlying mechanisms, success factors, bottlenecks, sustainability, and lessons learned
- Methodological issues and research gaps.

#### 5. *Collating, summarizing and reporting the results*

We will describe the main characteristics of the included studies using descriptive statistics. We will use thematic content analysis to categorise the main review findings (57,60,61). During this analysis, we will use the "best fit" framework (BFF) synthesis, which provides a practical and rapid method for qualitative evidence synthesis and program theory development (64,65). It allows both deductive analysis using an "a priori" framework and inductive analysis based on new themes from selected studies that are not part of the a priori framework. The final result is a new framework with a priori and new evidence-based themes (64,65). To identify the a priori framework, we will carry out a parallel search using the BeHEMOTH (Behaviour of interest, Health context, Exclusions, Models or Theories) approach (64,66). Search strategy using the BeHEMOTH approach is presented in appendix 3.

We will report the results according to the PRISMA Extension for Scoping Reviews guidelines (67).

---

<sup>2</sup> We chose this year in reference to the Harare declaration on strengthening district health systems based on Primary Health Care

## References

1. Rapport OMD 2015: Évaluation des progrès réalisés en Afrique pour atteindre les Objectifs du Millénaire pour le Développement. 2015.
2. Ridge LJ, Klar RT, Stimpfel AW, Squires A. The meaning of “capacity building” for the nurse workforce in sub-Saharan Africa: An integrative review. *Int J Nurs Stud*. 2018;86:151–61.
3. Alliance for Health Policy and Systems Research. Strengthening health systems : the role and promise of policy and systems research. Geneva; 2004.
4. Egger D, Ollier E. Managing the Health Millennium Development Goals - The Challenge of Health Management Strengthening: Lessons from Three Countries. World Health Organization. Geneva; 2007.
5. Kwamie A, Dijk H van, Agyepong IA. Advancing the application of systems thinking in health: realist evaluation of the Leadership Development Programme for district manager decision-making in Ghana. *Heal Res Policy Syst*. 2014;12(1).
6. Doherty T, Tran N, Sanders D, Dalglish SL, Hipgrave D, Rasanathan K, et al. Role of district health management teams in child health strategies. *BMJ*. 2018;362:k2823.
7. Dorros GL. Building Management Capacity to Rapidly Scale up Health Services and Health Outcomes. 2006.
8. Aroni A. Health management capacity building. An integral component of health systems’ improvement. European Health Management Association. 2012.
9. Cleary S, Du Toit A, Scott V, Gilson L. Enabling relational leadership in primary healthcare settings: Lessons from the DIALHS collaboration. *Health Policy Plan*. 2018;33:ii65-ii74.
10. Bonenberger M, Aikins M, Akweongo P, Wyss K. Factors influencing the work efficiency of district health managers in low-resource settings: A qualitative study in Ghana. *BMC Health Serv Res*. 2016;16:12.
11. Gilson L, Agyepong IA. Strengthening health system leadership for better governance: what does it take? *Health Policy Plan*. 2018 Jul 1;33(suppl\_2):ii1-ii4.
12. World Health Organization. Building resilient sub-national health systems – Strengthening Leadership and Management Capacity of District Health Management Teams. 2016.
13. Heerdegen ACS, Gerold J, Amon S, Agyemang SA, Aikins M, Wyss K. How Does District Health Management Emerge Within a Complex Health System? Insights for Capacity Strengthening in Ghana. *Front Public Heal*. 2020;8(July):1–11.
14. Prashanth NS, Marchal B, Kegels G, Criel B. Evaluation of Capacity-Building Program of District Health Managers in India: A Contextualized Theoretical Framework. *Front Public Heal*. 2014;2(JUL):89.
15. Daire J, Gilson L, Cleary S. Developing leadership and management competencies in

- low and middle-income country health systems : a review of the literature Working Paper 4. Resilient & Responsive Health Systems. 2014.
16. Schneider H, George A, Mukinda F, Tabana H. District Governance and Improved Maternal, Neonatal and Child Health in South Africa: Pathways of Change. *Heal Syst reform*. United States; 2020;6(1):e1669943.
  17. Organisation mondiale de la santé. Renforcement des systèmes de santé: Amélioration de la prestation de services de santé au niveau du district, et de l'appropriation et de la participation communautaires. Rapport du Directeur régional. 2010.
  18. Mutale W, Vardoy-Mutale A-T, Kachemba A, Mukendi R, Clarke K, Mulenga D. Leadership and management training as a catalyst to health system strengthening in low-income settings: Evidence from implementation of the Zambia Management and Leadership course for district health managers in Zambia. *PLoS One*. 2017;12(7):e0174536.
  19. United Nations General Assembly. Transforming our world: the 2030 agenda for sustainable development. 2015.
  20. Tetui M, Hurtig A-K, Ekirpa-Kiracho E, Kiwanuka SN, Coe A-B. Building a competent health manager at district level: a grounded theory study from Eastern Uganda. *BMC Health Serv Res*. 2016;16:665.
  21. Morgan P. The design and use of capacity development indicators. 1997.
  22. Marchal B, Kegels G. Which role for Medicus Mundi Internationalis in Human Resources Development ? Current critical issues in Human Resources for Health. 2003.
  23. Finn M, Gilmore B, Sheaf G, Vallières F. What do we mean by individual capacity strengthening for primary health care in low- and middle-income countries? A systematic scoping review to improve conceptual clarity. *Hum Resour Health*. 2021;19(1):5.
  24. Prashanth NS, Marchal B, Devadasan N, Kegels G, Criel B. Advancing the application of systems thinking in health: a realist evaluation of a capacity building programme for district managers in Tumkur, India. *Heal Res Policy Syst*. 2014;12(1):42.
  25. Craig P, Dieppe P, Macintyre S, Mitchie S, Nazareth I, Petticrew M. Developing and evaluating complex interventions: The new Medical Research Council guidance. *Bmj*. 2008;337(7676):979–83.
  26. Petticrew M. When are complex interventions “complex”? When are simple interventions “simple”? *Eur J Public Health*. 2011;21(4):397–8.
  27. Whittle S, Colgan A, Rafferty M. Capacity Building: What the literature tells us. Dublin: The Centre for Effective Services. 2012.
  28. Glouberman S, Zimmerman B. Complicated and Complex Systems: What Would Successful Reform of Medicare Look Like? Commission on the Future of Health Care in Canada. 2002.
  29. Sturmberg JP, O'Halloran DM, Martin CM. Understanding health system reform - A complex adaptive systems perspective. *J Eval Clin Pract*. 2012;18(1):202–8.



30. De Savigny D, Adam T. Systems thinking for health systems strengthening. Alliance for Health Policy and Systems Research, WHO. 2009.
31. The Health Foundation. Evidence Scan: Complex Adaptive Systems. The Health Foundation. 2010.
32. Belrhiti Z, Giralt AN, Marchal B. Complex leadership in healthcare: A scoping review. *Int J Heal Policy Manag*. 2018;7(12):1073–84.
33. Prashanth NS, Marchal B, Hoeree T, Devadasan N, Macq J, Kegels G, et al. How does capacity building of health managers work? A realist evaluation study protocol. *BMJ Open*. 2012;2(2):e000882.
34. Lusthaus C, Adrien M, Perstinger M. Capacity Development : Definitions , Issues and Implications for Planning , Monitoring and Evaluation. *Universalia Occas Pap*. 1999;(35):1–21.
35. Potter C, Brough R. Systemic capacity building : a hierarchy of needs. *Health Policy Plan*. 2004;19(5):336–45.
36. LaFond AK, Brown L, Macintyre K. Mapping capacity in the health sector: A conceptual framework. *Int J Health Plann Manage*. 2002;17(1):3–22.
37. Hawe P, Noort M, King L, Jordens C. Multiplying Health Gains: the critical role of capacity-building within health promotion programs. *Health Policy (New York)*. 1997;39(1):29–42.
38. Crisp BR. Four approaches to capacity building in health: consequences for measurement and accountability. *Health Promot Int*. 2000;15(2):99–107.
39. NSW Health Department. A Framework for Building Capacity. 2001.
40. Land T. Implementing institutional and capacity development: Conceptual and operational issues. 2000.
41. Goldberg J, Bryant M. Country ownership and capacity building: the next buzzwords in health systems strengthening or a truly new approach to development? *BMC Public Health*. 2012;12:531.
42. Gholipour K, Tabrizi JS, Farahbakhsh M, Iezadi S, Ghiasi A, Jahanbin H. Evaluation of the district health management fellowship training programme: a case study in Iran. *BMJ Open*. 2018;8(3):e020603.
43. Supic ZT, Bjegovic V, Marinkovic J, Milicevic MS, Vasic V. Hospital management training and improvement in managerial skills: Serbian experience. *Health Policy (New York)*. 2010;96(1):80–9.
44. Tabrizi JS, Gholipour K, Farahbakhsh M, Jahanbin H, Karamuz M. Developing management capacity building package to district health manager in northwest of Iran : A sequential mixed method study. *J Pak Med Assoc*. 2016;66(11):1385–91.
45. Chelagat T, Rice J, Onyango J, Kokwaro G. An Assessment of Impact of Leadership Training on Health System Performance in Selected Counties in Kenya. *Front Public Heal*. 2021;8(February):1–12.

46. El-Sayed H, Martines J, Rakha M, Zekry O, Abdel-Hak M, Abbas H. The effectiveness of the WHO training course on complementary feeding counseling in a primary care setting, Ismailia, Egypt. *J Egypt Public Health Assoc.* 2014;89(1):1–8.
47. El Nouman A, El Derwi D, Abdel HR, Abou Zeina H. Female youth health promotion model in primary health care: a community-based study in rural upper Egypt. *East Mediterr Health J.* 2009;15(6):1513–24.
48. Omar M, Gerein N, Tarin E, Butcher C, Pearson S, Heidari G. Training evaluation: A case study of training Iranian health managers. *Hum Resour Health.* 2009;7:1–14.
49. United Nations Development Programme. Capacity assessment and development in a systems and strategic management context. 1998.
50. International NGO Training and Research Centre. Tracking Capacity Change. 2016.
51. Orgill M, Marchal B, Shung-King M, Sikuza L, Gilson L. Bottom-up innovation for health management capacity development: a qualitative case study in a South African health district. *BMC Public Health.* 2021;21:587.
52. Milèn A. An overview of existing knowledge and good practice? An overview of existing knowledge and good practice. 2001.
53. Matachi A. Capacity Building Framework. UNESCO-International Institute for Capacity Building in Africa. 2006.
54. Brown L, Lafond A, Macintyre K. Measuring Capacity Building. 2001.
55. DeCorby-Watson K, Mensah G, Bergeron K, Abdi S, Rempel B, Manson H. Effectiveness of capacity building interventions relevant to public health practice: a systematic review. *BMC Public Health.* 2018;18:684.
56. Bergeron K, Abdi S, DeCorby K, Mensah G, Rempel B, Manson H. Theories, models and frameworks used in capacity building interventions relevant to public health: a systematic review. *BMC Public Health.* 2017;17:914.
57. Arksey H, O'Malley L. Scoping studies: Towards a methodological framework. *Int J Soc Res Methodol Theory Pract.* 2005;8(1):19–32.
58. Colquhoun HL, Levac D, O'Brien KK, Straus S, Tricco AC, Perrier L, et al. Scoping reviews: Time for clarity in definition, methods and reporting Scoping reviews: Time for clarity in definition How to cite TSpace items. *J Clin Epidemiol.* 2014;67(12):3–13.
59. Levac D, Colquhoun H, O'Brien KK. Scoping studies: Advancing the methodology. *Implement Sci.* 2010;5(1):1–9.
60. Daudt HML, van Mossel C, Scott SJ. Enhancing the scoping study methodology: a large, inter-professional team's experience with Arksey and O'Malley's framework. *BMC Med Res Methodol.* 2013;13:48.
61. Peters MDJ, Godfrey CM, Khalil H, McInerney P, Parker D, Soares CB. Guidance for conducting systematic scoping reviews. *Int J Evid Based Healthc.* 2015;13(3):141–6.
62. Belrhiti Z, Booth A, Marchal B, Verstraeten R. To what extent do site-based training, mentoring, and operational research improve district health system management and

- leadership in low- and middle-income countries: a systematic review protocol. *Syst Rev. Systematic Reviews*; 2016;5(1):70.
63. Ouzzani M, Hammady H, Fedorowicz Z, Elmagarmid A. Rayyan — a web and mobile app for systematic reviews. *Syst Rev. Systematic Reviews*; 2017;(2016):1–10.
  64. Carroll C, Booth A, Leaviss J, Rick J. “Best fit” framework synthesis: refining the method. *BMC Med Res Methodol*. 2013;13:37.
  65. Carroll C, Booth A, Cooper K. A worked example of “best fit” framework synthesis: A systematic review of views concerning the taking of some potential chemopreventive agents. *BMC Med Res Methodol*. 2011;11:29.
  66. Booth A, Carroll C. Systematic searching for theory to inform systematic reviews: Is it feasible? Is it desirable? *Health Info Libr J*. 2015;32(3):220–35.
  67. Tricco AC, Lillie E, Zarin W, O’Brien KK, Colquhoun H, Levac D, et al. PRISMA extension for scoping reviews (PRISMA-ScR): Checklist and explanation. *Ann Intern Med*. 2018;169(7):467–73.

## Appendix 1: MEDLINE (PubMed) search strategy

We will conduct a systematic electronic search using Mesh terms and free terms Population AND Concept AND Context

((((((((((("Health Personnel"[Mesh]) OR ("District health management teams")) OR ("Institutional Management Teams" [Mesh])) OR ("Public Health Administration" [Mesh])) OR (District Health manage\*) OR ("District medical officers")) OR ("Nursing officers")) OR ("Nursing directors")) OR ("Nurse supervisors")) OR ("Nurse Administrators" [Mesh])) OR ("District health administrators"))) AND (((((((("Capacity Building"[Mesh]) OR ("Capacity Development")) OR (Capacity Strengthening)) OR (District Health Management Development)) OR (District Health Leadership Development)) OR (District Health System Strengthening)))) AND (((("Sub Saharan Africa") OR ("Africa South of the Sahara"[Mesh])) OR (Angola OR Benin OR Botswana OR "Burkina Faso" OR Burundi OR Cameroon OR "Cape Verde" OR "Central African Republic" OR Chad OR Comoros OR "Democratic Republic of Congo" OR Zaire OR "Republic of Congo" OR "Ivory Coast" OR Djibouti OR "Equatorial Guinea" OR Eritrea OR Ethiopia OR Gabon OR Gambia OR Ghana OR Guinea OR "Guinea-Bissau" OR Kenya OR Lesotho OR Liberia OR Libya OR Madagascar OR Malawi OR Mali OR Mauritania OR Mozambique OR Namibia OR Niger OR Nigeria OR Rwanda OR "Sao Tomé and Príncipe" OR Senegal OR Seychelles OR "Sierra Leone" OR Somali OR "South Africa" OR Sudan OR South Sudan OR Swaziland OR Tanzania OR Togo OR Uganda OR Zambia OR Zimbabwe))) Filters: Humans, English, French, from 1987/1/1 - 2022/04/06

## Appendix 2: Search strategy for best fit frameworks

We will conduct a systematic electronic search using Mesh terms and free terms BeHEMoTh (Be AND H NOT E AND MoTh)

|                            | Terms                                                                | Search strategy                                                                                                          |
|----------------------------|----------------------------------------------------------------------|--------------------------------------------------------------------------------------------------------------------------|
| Behaviour of interest (Be) | District Health Management and Leadership                            | (Health District) AND ((Manage*) OR (Leader*))                                                                           |
| Health context (H)         | Capacity Building, Capacity Development, Capacity Strengthening      | ((Capacity Building) OR (Capacity Development)) OR (Capacity Strengthening))                                             |
| Exclusion (E)              | Surveillance Model, Epidemiological Model, Disease Model, Care Model | ((("Surveillance Model") OR ("Epidemiological Model")) OR ("Disease Model")) OR ("Care Model") OR ("Statistical Model")) |
| Models of theories (MoTh)  | Theory, Model, Concept, framework                                    | ((Theor*) OR (Model*)) OR (Concept*) OR (Framework*)                                                                     |

((((Health District) AND ((Manage\*) OR (Leader\*))) AND (((Capacity Building) OR (Capacity Development)) OR (Capacity Strengthening)))) NOT (((("Surveillance Model") OR ("Epidemiological Model")) OR ("Disease Model")) OR ("Care Model") OR ("Statistical Model"))) AND (((Theor\*) OR (Model\*)) OR (Concept\*) OR (Framework\*))
